# Supplementary material for: Diminishing Immune Responses against Variants of Concern in Dialysis Patients 4 Months after SARS-CoV-2 mRNA Vaccination
Source: PubMed Central journal article supplement (PMC8962909; doi:10.3201/eid2804.211907), 2022-04
Supplement: 21-1907-Techapp-s1.pdf [file 21-1907-Techapp-s1.pdf]

# Diminishing Immune Responses against Variants of Concern in Dialysis Patients 4 Months after SARS-CoV-2 mRNA Vaccination

## Appendix

**Appendix Table 1.** Therapeutic indication for hemodialysis\*

| Diagnosis                                      | No. patients (%) in hemodialysis group |
|------------------------------------------------|----------------------------------------|
| Total                                          | 76 (100)                               |
| Autosomal dominant polycystic kidney disease   | 11 (14.47)                             |
| Chronic glomerulonephritis                     | 6 (7.90)                               |
| Diabetic nephropathy                           | 11 (14.47)                             |
| Focal segmental glomerulosclerosis             | 5 (6.59)                               |
| IgA nephropathy                                | 8 (10.53)                              |
| Interstitial nephropathy                       | 6 (7.90)                               |
| Nephrosclerosis                                | 16 (21.05)                             |
| Acute toxic tubular epithelial damage syndrome | 1 (1.32)                               |
| Primary amyloidosis                            | 1 (1.32)                               |
| ANCA-associated vasculitis                     | 1 (1.32)                               |
| Cardiorenal syndrome                           | 2 (2.64)                               |
| Medullary cystic kidney disease                | 1 (1.32)                               |
| Membranous glomerulonephritis                  | 1 (1.32)                               |
| Kidney dysplasia                               | 1 (1.32)                               |
| Obstructive nephropathy                        | 1 (1.32)                               |
| Reflux nephropathy                             | 1 (1.32)                               |
| Septic organ failure                           | 1 (1.32)                               |
| Cystic kidney disease                          | 1 (1.32)                               |
| Cyclosporin intoxication                       | 1 (1.32)                               |

\*ANCA, antineutrophilic cytoplasmic autoantibody.

**Appendix Table 2.** Medication of vaccination cohort

| Medication                                                            | No. (%)                   |                    |
|-----------------------------------------------------------------------|---------------------------|--------------------|
|                                                                       | Nondialysis control group | Hemodialysis group |
| Total                                                                 | 23 (100)                  | 76 (100)           |
| Angiotensin-converting enzyme inhibitors                              | 2 (8.70)                  | 22 (28.95)         |
| Statins                                                               | 0 (0)                     | 45 (59.21)         |
| Angiotensin II Receptor Blockers                                      | 5 (21.74)                 | 25 (32.89)         |
| Vitamin D Supplements                                                 | 12 (52.17)                | 75 (98.68)         |
| Immunosuppressants (dosing range per day)*                            |                           |                    |
| Prednisolone (2–7.5 mg)                                               | 0                         | 5 (6.59)           |
| Prednisolone (50 mg) day 6–14 post 2nd vaccination                    | 0                         | 1 (1.32)           |
| Prednisolone (5 mg), Tacrolimus (0.5–2 mg)                            | 0                         | 2 (2.64)           |
| Prednisolone (5 mg), Tacrolimus (12 mg), Mycophenolatmofetil (500 mg) | 0                         | 1 (1.32)           |
| Hydrocortisone (20 mg)                                                | 0                         | 1 (1.32)           |

\*Therapeutic indication for immunosuppression were in four patients a kidney transplant (one had received an additional liver transplant), polymyositis, polyarthritis, vasculitis and chronic obstructive pulmonary disease.

**Appendix Table 3.** MULTICOV-AB antigen panel

| Virus      | Antigen               | Manufacturer | Product number |
|------------|-----------------------|--------------|----------------|
| SARS-CoV-2 | Spike Trimer          | NMI          | –              |
| SARS-CoV-2 | RBD B.1 (wild-type)   | NMI          | –              |
| SARS-CoV-2 | Nucleocapsid          | Aalto        | 6404-b         |
| SARS-CoV-2 | S1 domain             | NMI          | –              |
| SARS-CoV-2 | S2 domain             | NMI          | –              |
| SARS-CoV-2 | RBD B.1.1.7 (Alpha)   | NMI          | –              |
| SARS-CoV-2 | RBD B.1.351 (Beta)    | NMI          | –              |
| SARS-CoV-2 | RBD P.3 (Gamma)       | NMI          | –              |
| SARS-CoV-2 | RBD B.1.617.2 (Delta) | NMI          | –              |
| hCoV-OC43  | S1 domain             | NMI          | –              |
| hCoV-OC43  | Nucleocapsid          | NMI          | –              |
| hCoV-HKU1  | S1 domain             | NMI          | –              |
| hCoV-HKU1  | Nucleocapsid          | NMI          | –              |
| hCoV-NL63  | S1 domain             | NMI          | –              |
| hCoV-NL63  | Nucleocapsid          | NMI          | –              |
| hCoV-229E  | S1 domain             | NMI          | –              |
| hCoV-229E  | Nucleocapsid          | NMI          | –              |

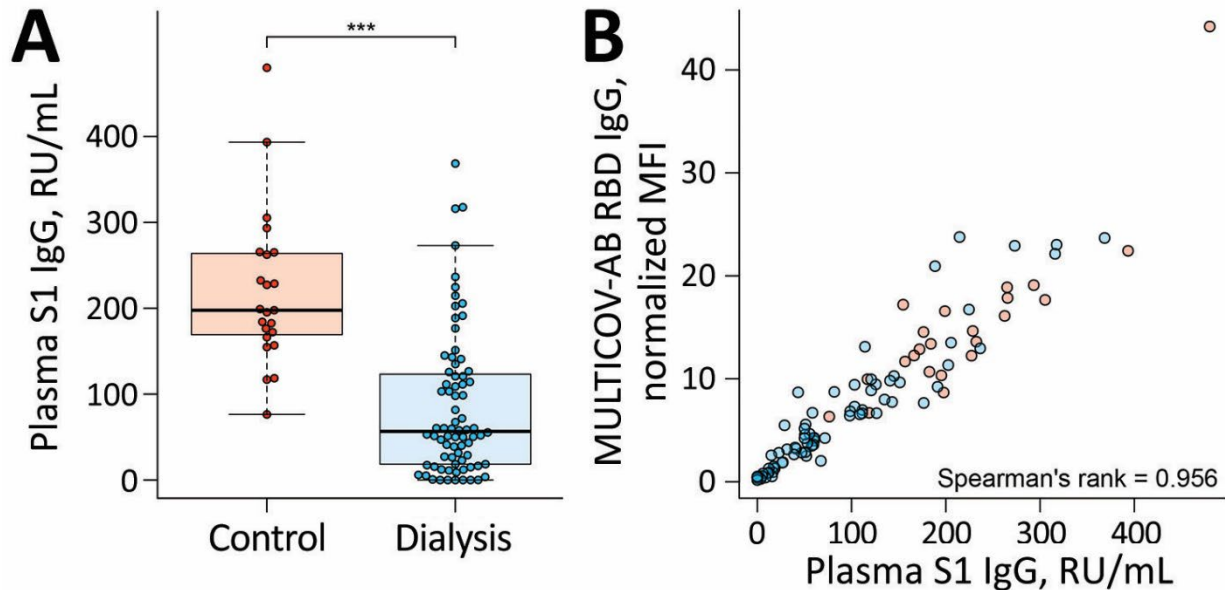

**Appendix Figure 1.** Quantitative plasma IgG titers 16 weeks after vaccination with Pfizer BNT162b2. A) Spike S1-specific plasma IgG (RU/mL) from control group (red, n = 23) and dialysis group (blue, n = 76) were analyzed 16 weeks post-second dose of Pfizer BNT162b2 using the QuantiVac-ELISA (Euroimmun). Samples above upper or below the ELISA's limits of detection are shown at the corresponding limit. Boxes represent the median, 25<sup>th</sup> and 75<sup>th</sup> percentiles, whiskers show the largest and smallest non-outlier values. Outliers were determined by 1.5 times IQR. Statistical significance was calculated by two-sided Mann-Whitney-U test. Significance was defined as \*\*\*<0.001. B) Correlation of MULTICOV-AB wild-type RBD B.1-IgG and QuantiVac Spike S1-IgG across the study population. Spearman's rank was used for correlation analysis.

**A**

Plasma SARS-CoV-2 RBD IgA, normalized MFI

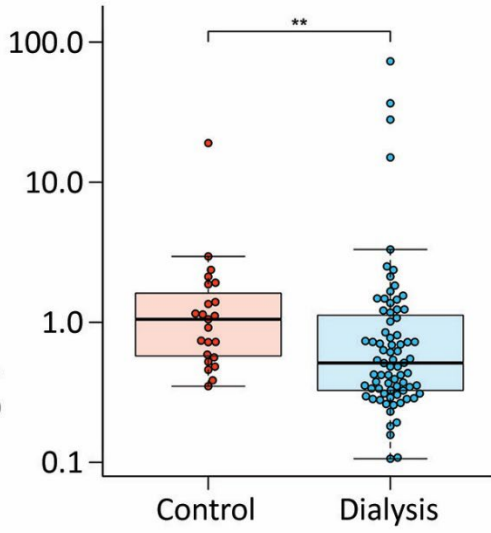**B**

Saliva SARS-CoV-2 RBD IgA, MFI

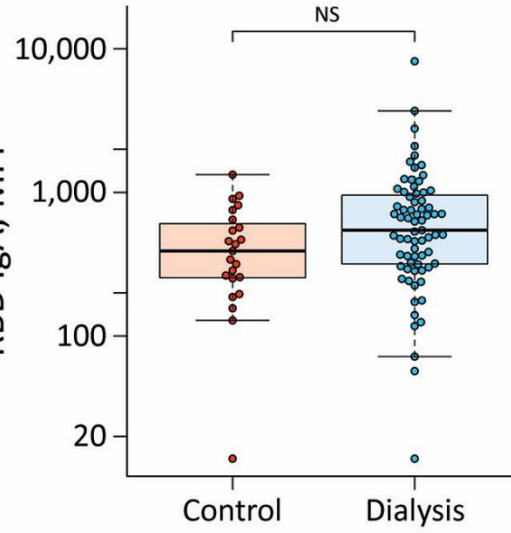

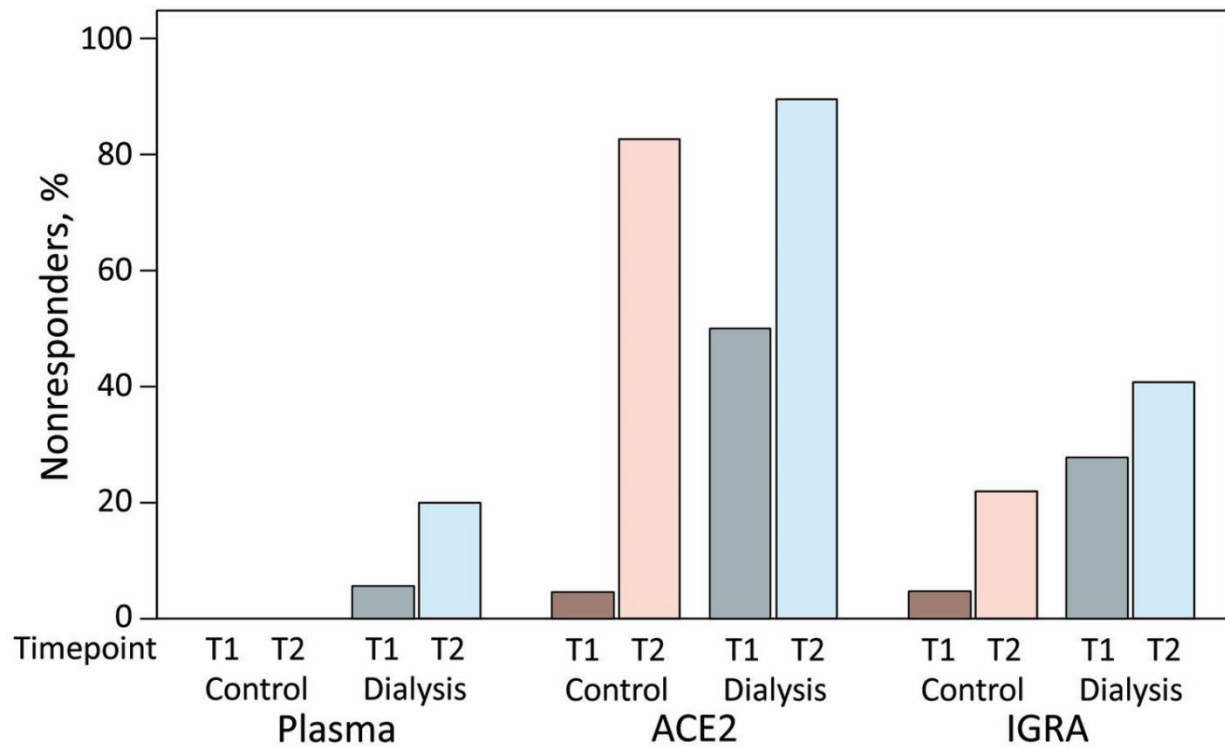

## Reference

1. Strengert M, Becker M, Ramos GM, Dulovic A, Gruber J, Juengling J, et al. Cellular and humoral immunogenicity of a SARS-CoV-2 mRNA vaccine in patients on haemodialysis. *EBioMedicine*. 2021;70:103524. [PubMed https://doi.org/10.1016/j.ebiom.2021.103524](https://doi.org/10.1016/j.ebiom.2021.103524)
